# Supplementary material for: Fusobacterium nucleatum enhances the efficacy of PD-L1 blockade in colorectal cancer
Source: PubMed Central journal article supplement (PMC8602417; doi:10.1038/s41392-021-00795-x), 2021-11-19
Supplement: 41392_2021_795_MOESM1_ESM.pdf [file 41392_2021_795_MOESM1_ESM.pdf]

## Supplementary Materials for

*Fusobacterium nucleatum* enhances the efficacy of PD-L1 blockade in colorectal cancer

Yaohui Gao<sup>1#</sup>, Dexi Bi<sup>1#</sup>, Ruting Xie<sup>1#</sup>, Man Li<sup>1</sup>, Jing Guo<sup>1</sup>, Hu Liu<sup>1</sup>, Xianling Guo<sup>2</sup>, Juemin Fang<sup>2</sup>, Tingting Ding<sup>1</sup>, Huiyuan Zhu<sup>1</sup>, Yuan Cao<sup>1</sup>, Meichun Xing<sup>1</sup>, Jiayi Zheng<sup>1</sup>, Qing Xu<sup>2</sup>, Qian Xu<sup>3</sup>, Qing Wei<sup>1\*</sup>, Huanlong Qin<sup>3\*</sup>.

\*Correspondence to: Wei-Li Zhao, Email: zhao.weili@yahoo.com, and Meng-Meng Ji, Email: jimengmeng025@163.com.

**This PDF file includes:**

Figures. S1 to S10

Tables S1 to S2

1

### Gao et al. Supplementary Figure 1

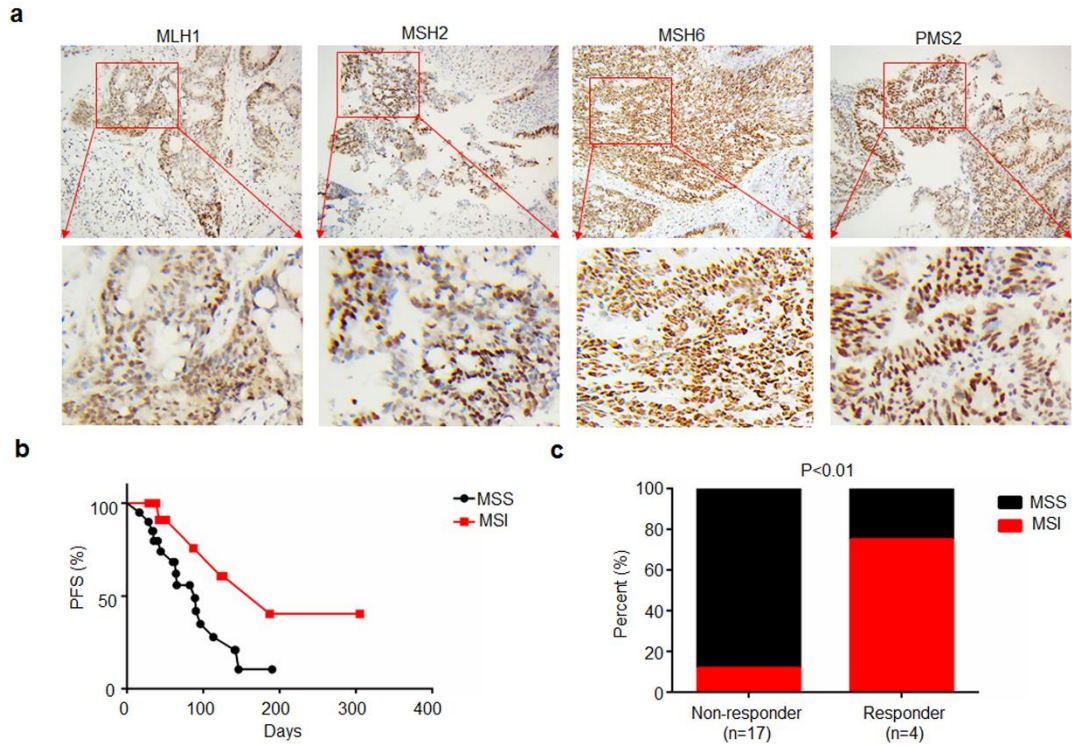

2

3 **Fig. S1** Patients with dMMR were more responsive to PD-1 blockade than  
4 those with pMMR. **a** Representative Immunohistochemistry images of  
5 mismatch repair proteins in CRC tumor tissues. **b** The progression-free  
6 survival of patients with CRC (n=35). **c** Correlation analysis between  
7 patient outcomes and different MMR status. Chi-square test (one-sided).

8

## Gao et al. Supplementary Figure 2

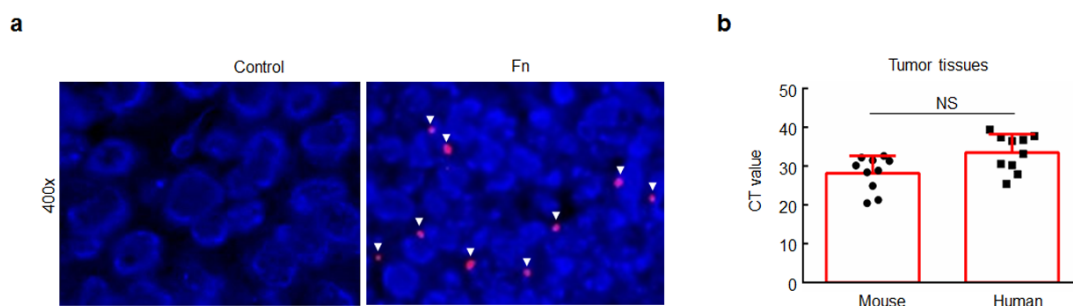

**Fig. S2** *F. nucleatum* could colonize the tumor tissue of mice injected intratumorally with *F. nucleatum*. CT26.WT cells were injected subcutaneously into BALB/c mice. Tumor-bearing mice were intratumorally injected with PBS (control) or *F. nucleatum* ( $10^9$  CFU) every two days for two weeks. **a** A FISH assay showed that *F. nucleatum* (red) was present in the tumor tissues of mice. The nuclei (blue) of cells in tumor tissue samples were stained with DAPI. The white arrows indicate positive staining (red) for *F. nucleatum*. The images are representative of the different treatment groups. **b** *F. nucleatum* was detected by RT-PCR in mouse and human CRC tissue samples ( $n=10$ ). Data are expressed as mean + s.d. Student's t-test. NS, not significant. Fn, *F. nucleatum*.

### Gao et al. Supplementary Figure 3

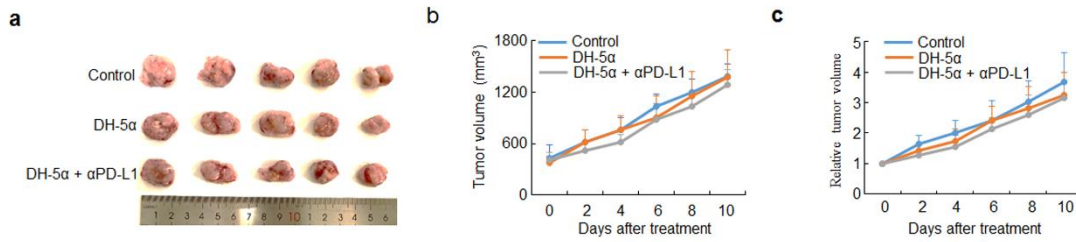

**Fig. S3** Intratumoral injection of DH-5α did not affect the therapeutic efficacy of PD-L1 blockade. CT26.WT cells were subcutaneously injected into BALB/c mice. Tumor-bearing mice were intratumorally injected with PBS (control) or DH-5α ( $10^9$  CFU) every two days and were intraperitoneally injected with an anti-PD-L1 mAb or an isotype control mAb. **a** An image of tumors collected in different groups at the end of the experiment is shown. **b, c** Tumor volumes and relative tumor volumes in different groups are shown. Data are shown as mean  $\pm$  s.d. One-way ANOVA and Bonferroni's multiple comparison test. Fn, *F. nucleatum*.

1

## Gao et al. Supplementary Figure 4

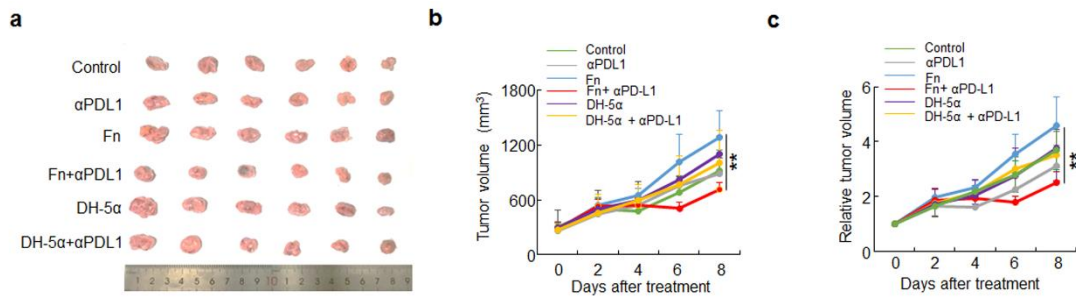

2

3 **Fig. S4** Gavage administration of *F. nucleatum* augmented the antitumor  
4 effects of PD-L1 blockade on CRC. CT26.WT cells were injected  
5 subcutaneously into BALB/c mice. Tumor-bearing mice were  
6 administered with PBS (control), *F. nucleatum* ( $10^9$  CFU) or DH-5 $\alpha$  ( $10^9$   
7 CFU) by gavage every two days and treated with an anti-PD-L1 mAb or  
8 an isotype control mAb by intraperitoneal injection. Tumor volumes were  
9 measured. **a** A picture of tumors from mice in different groups are shown.  
10 **b, c** Tumor volume growth and relative tumor volume growth were  
11 assessed. One-way ANOVA and Bonferroni's multiple comparison test.  
12 \*\*P<0.01.

13

14

1

## Gao et al. Supplementary Figure 5

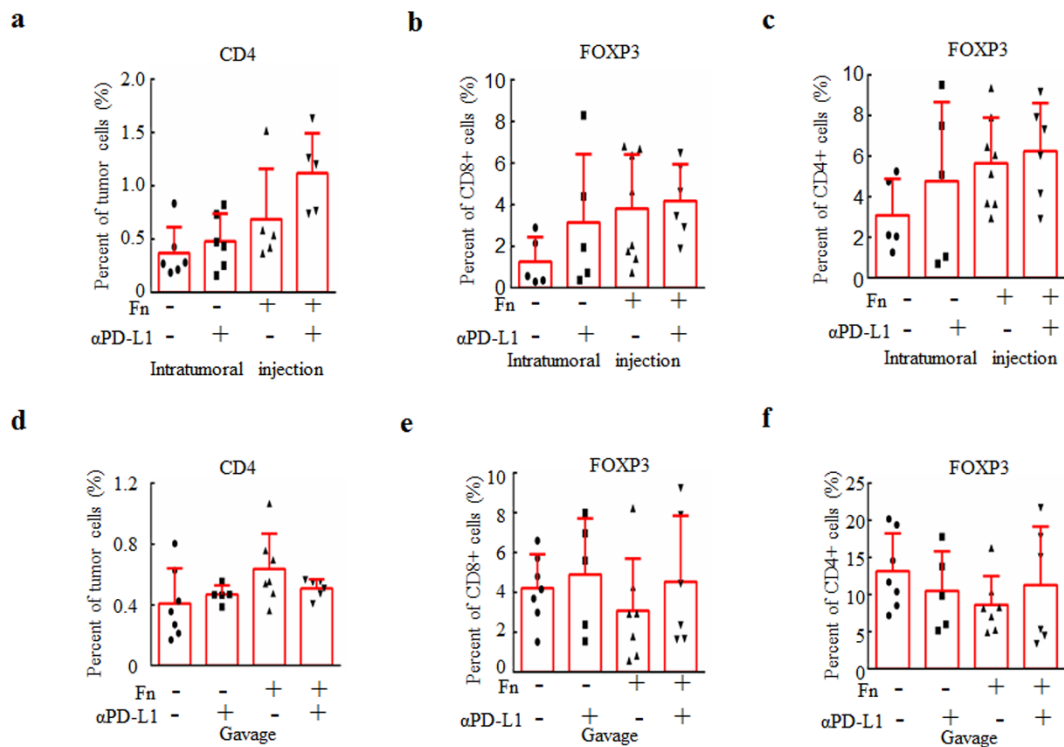

2

3 **Fig. S5** *F. nucleatum* did not modulate the proportion of CD4<sup>+</sup> and FOXP3<sup>+</sup>

4 T cells during treatment with an anti-PD-L1 mAb. CT26.WT cells were

5 subcutaneously injected into BALB/c mice. **a-c** Tumor-bearing mice were

6 treated with PBS or *F. nucleatum* by intratumoral injection and

7 intraperitoneally injected with an anti-PD-L1 mAb or an isotype control

8 mAb. Flow cytometry was used to detect the levels of different types of T

9 lymphocytes in the tumor tissues of mice. One-way ANOVA and

10 Bonferroni's multiple comparison test. **d-f** Tumor-bearing mice were

11 treated with PBS or *F. nucleatum* by gavage and intraperitoneally injected

12 with an anti-PD-L1 mAb or an isotype control mAb. Flow cytometry was

13 used to detect the levels of different types of T lymphocytes in the tumor

14 tissues. One-way ANOVA and Bonferroni's multiple comparison test.

1

## Gao et al. Supplementary Figure 6

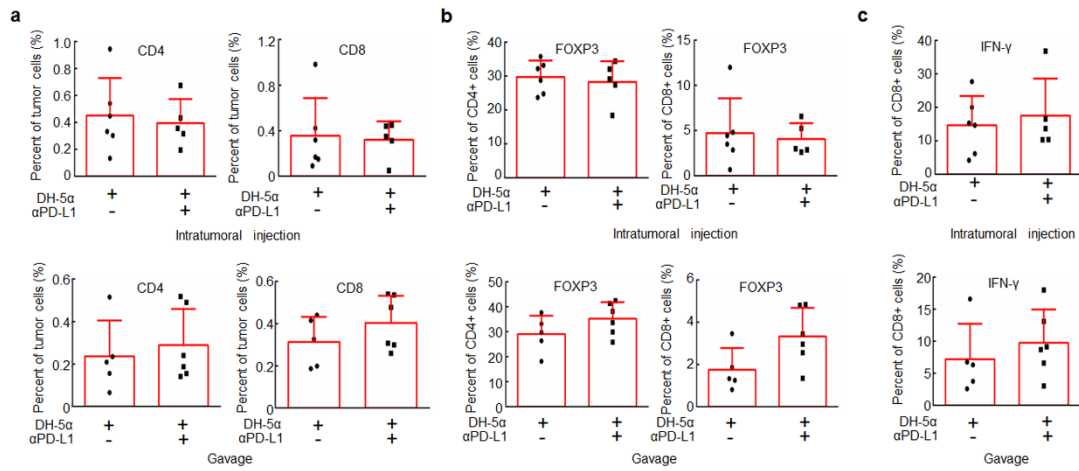

2

3 **Fig. S6** DH-5α does not modulate the proportion or activity of CD8<sup>+</sup> T cells  
 4 during treatment with an anti-PD-L1 mAb. CT26.WT cells were  
 5 subcutaneously injected into BALB/c mice. Tumor-bearing mice were  
 6 treated with DH-5α (10<sup>9</sup> CFU) or PBS (control) by intratumoral injection  
 7 or garage and intraperitoneally injected with an anti-PD-L1 mAb or an  
 8 isotype control mAb. For mice treated with DH-5α by intratumoral  
 9 injection, the anti-PD-L1 mAb treatment time was 9 days. For mice treated  
 10 with DH-5α by garage, the anti-PD-L1 mAb treatment time is 7 days. **a-c**  
 11 Flow cytometry was used to detect the levels of different types of T  
 12 lymphocytes in the tumor tissue of mice. One-way ANOVA and  
 13 Bonferroni's multiple comparison test. All P>0.05.

14

1

### Gao et al. Supplementary Figure 7

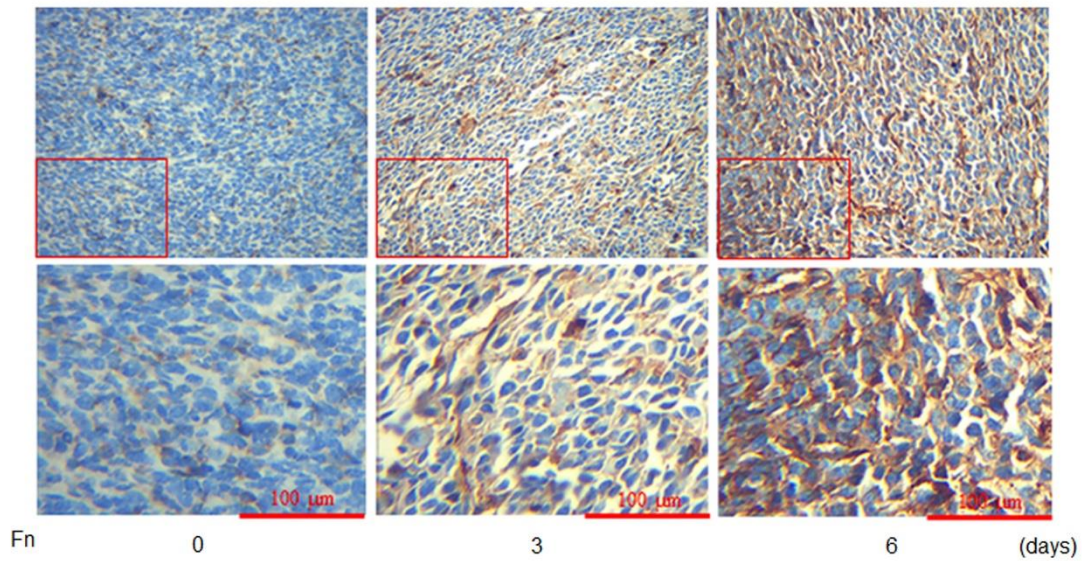

2

3 **Fig. S7** *F. nucleatum* treatment enhanced PD-L1 expression in mouse  
4 tumor tissues. CT26.WT cells were subcutaneously injected into BALB/c  
5 mice. When the tumor volumes reached more than 100 mm<sup>3</sup>, tumor-  
6 bearing mice were intratumorally injected with *F. nucleatum* (10<sup>9</sup> CFU) for  
7 3 days or 6 days. The expression of PD-L1 (brown) was detected by IHC.  
8 Hematoxylin (blue) was used to visualize nuclei. The IHC images are  
9 representatives of different treatment groups.

10



1

## Gao et al. Supplementary Figure 8

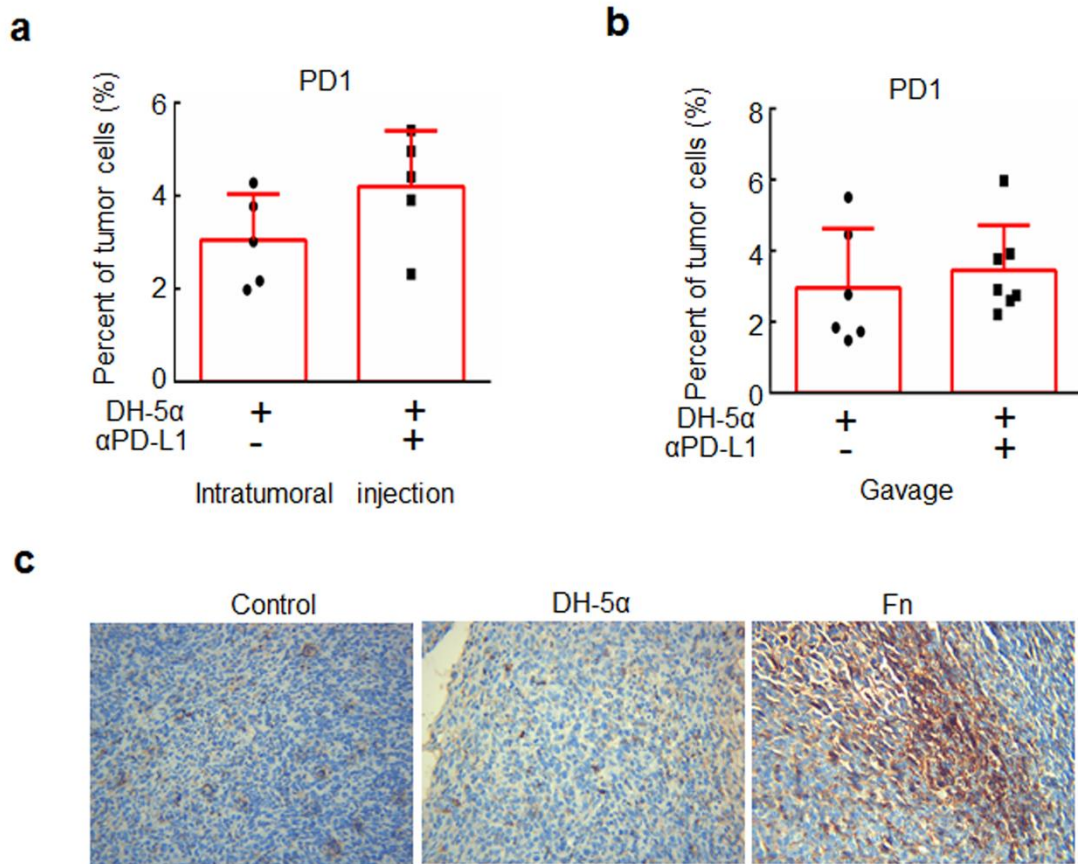

2

3 **Fig. S8** DH-5α did not modulate the proportion of PD-1<sup>+</sup> T cells or PD-L1  
4 expression during treatment with an anti-PD-L1 mAb. CT26.WT cells  
5 were subcutaneously injected into BALB/c mice. **a, c** Tumor-bearing mice  
6 were treated with DH-5α, *F. nucleatum* or PBS (control) by intratumoral  
7 injection or garage for 10 days. **a** Flow cytometry was used to detect the  
8 proportion of PD-1<sup>+</sup> cells in tumor tissue samples. Student's t-test. **c** The  
9 expression of PD-L1 (brown) detected by IHC. Hematoxylin (blue) was  
10 used to visualize nuclei. **b** Tumor-bearing mice were treated with DH-5α  
11 or PBS by garage for 8 days. Flow cytometry was used to detect the  
12 proportion of PD-1<sup>+</sup> cells in tumor tissue samples. Student's t-test.

1

### Gao et al. Supplementary Figure 9

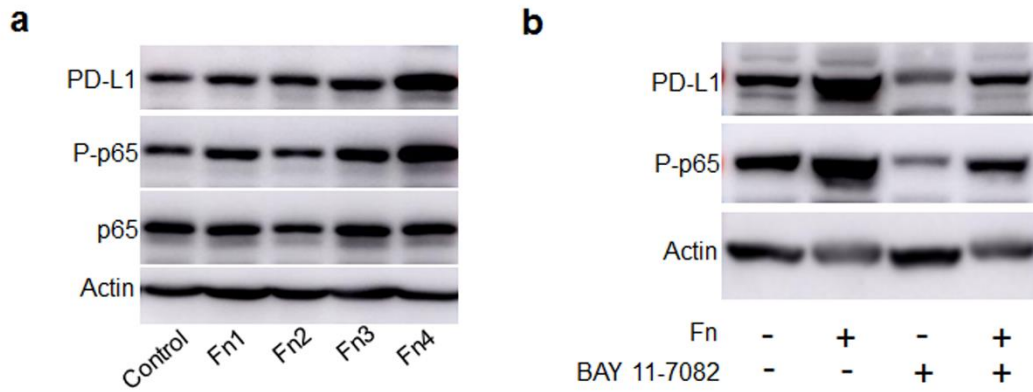

2

3 **Fig. S9** *F. nucleatum* upregulated the expression of PD-L1 by  
4 phosphorylation of P65. **a** DLD1 cells were treated with different *F.*  
5 *nucleatum* isolates obtained from CRC patients, and the expression of the  
6 indicated proteins was detected. **b** Caco-2 cells were treated with Fn  
7 (1:1000) and/or 5  $\mu$ M BAY 11-7082 for 24 hours. Protein expression was  
8 detected by Western blotting.

9

Gao et al. Supplementary Figure 10

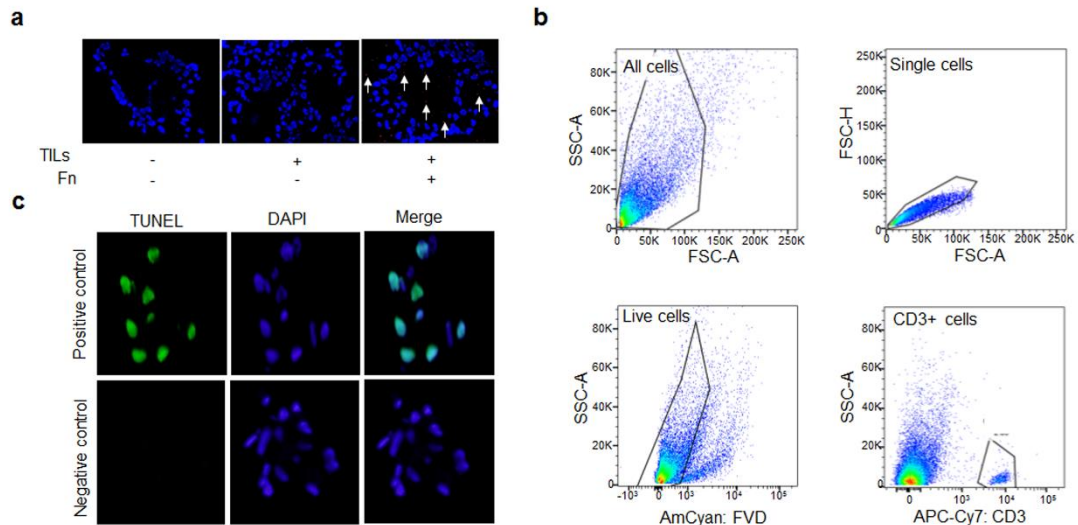

**Fig. S10** Validation of tumor-derived organoid models of CRC. CRC organoids were mixed with TILs ( $10^5$ /well) and *F. nucleatum* ( $10^8$  CFU) for one week. **a** *F. nucleatum* was detected in the CRC organoids with a FISH assay. The nuclei (blue) of cells in tumor tissue samples were stained with DAPI. The white arrows indicate positive staining (red) for *F. nucleatum*. **b** Flow cytometry was used to detect CD3<sup>+</sup> T cells in the CRC organoids. **c** The controls for the TUNEL assay are shown. The CRC organoids without treatment were used as negative controls. The CRC organoids with DNase I treatment (1500u/ml) for 30 min were used as negative controls.

1

**Supplementary Table 1**

| Characteristics             |        | No. of patients | Fn content |     | P value |
|-----------------------------|--------|-----------------|------------|-----|---------|
|                             |        |                 | High       | Low |         |
| Age (years)                 | ≥65    | 11              | 7          | 4   | 0.3096  |
|                             | <65    | 16              | 7          | 9   |         |
| Gender                      | Male   | 17              | 10         | 7   | 0.3445  |
|                             | Female | 10              | 4          | 6   |         |
| Liver metastasis            | Yes    | 14              | 9          | 5   | 0.1796  |
|                             | No     | 13              | 5          | 8   |         |
| Lung metastasis             | Yes    | 13              | 7          | 6   | 0.8416  |
|                             | No     | 14              | 7          | 7   |         |
| Abdominal cavity metastasis | Yes    | 7               | 1          | 6   | 0.0208* |
|                             | No     | 20              | 13         | 7   |         |
| pelvic metastasis           | Yes    | 4               | 2          | 2   | 0.936   |
|                             | No     | 23              | 12         | 11  |         |
| Ovarian metastasis          | Yes    | 4               | 2          | 2   | 0.936   |
|                             | No     | 23              | 12         | 11  |         |
| Bone metastasis             | Yes    | 4               | 2          | 2   | 0.936   |
|                             | No     | 23              | 12         | 11  |         |

2 **Table S1.** Correlations between the relative *F. nucleatum* levels in tumor  
3 tissues and clinicopathological characteristics of the patients with CRC.  
4 The Chi-square test was used for analysis.

5

1

**Supplementary Table 2**

| Characteristics             |        | No. of patients | Fn  |    | P value |
|-----------------------------|--------|-----------------|-----|----|---------|
|                             |        |                 | Yes | No |         |
| Age (years)                 | ≥65    | 15              | 11  | 4  | 0.8023  |
|                             | <65    | 23              | 16  | 7  |         |
| Gender                      | Male   | 28              | 21  | 7  | 0.3693  |
|                             | Female | 10              | 6   | 4  |         |
| Liver metastasis            | Yes    | 23              | 15  | 8  | 0.326   |
|                             | No     | 15              | 12  | 3  |         |
| Lung metastasis             | Yes    | 21              | 14  | 7  | 0.5076  |
|                             | No     | 17              | 13  | 4  |         |
| Abdominal cavity metastasis | Yes    | 9               | 8   | 1  | 0.1768  |
|                             | No     | 29              | 19  | 10 |         |
| pelvic metastasis           | Yes    | 4               | 2   | 2  | 0.3263  |
|                             | No     | 34              | 25  | 9  |         |
| Ovarian metastasis          | Yes    | 2               | 1   | 1  | 0.5     |
|                             | No     | 36              | 26  | 10 |         |
| Bone metastasis             | Yes    | 6               | 5   | 1  | 0.4698  |
|                             | No     | 32              | 22  | 10 |         |

2 **Table S2.** Correlations between the relative *F. nucleatum* levels in feces  
3 and clinicopathological characteristics of the patients with CRC. The Chi-  
4 square test was used for analysis.

5

6

7

8
